# Supplementary material for: Genomic traits and social determinants of health drive bacterial antimicrobial resistance: current trends and projections to 2050
Source: Research Square preprint supplement (doi:10.21203/rs.3.rs-6129213/v1), 2025-03-06
Supplement: Supplementary file 1 [file a16fd398228a1e98020272b6.xlsx]

## Sheet: Sheet1
Specie	ISA cohort level	ISA ST level
Acinetobacter baumannii	0.4391	0.2129
Clostridioides difficile	0.1795	0.1095
Corynebacterium diphtheriae	0.0648	0.0393
Enterococcus faecium	0.0803	0.0476
Escherichia coli	0.5627	0.1614
Klebsiella pneumoniae	0.1562	0.001
Mycobacterium tuberculosis	-0.0064	-0.0903
Neisseria gonorrhoeae	0.0875	-0.0063
Pseudomonas aeruginosa	0.1259	0.0307
Salmonella enterica	0.804	0.264
Shigella flexneri	NA	NA
Shigella sonnei	NA	NA
Staphylococcus aureus	0.597	0.2487
Streptococcus agalactiae	0.5157	0.2151
Streptococcus pneumoniae	0.1161	0.0327
Streptococcus suis	0.7303	0.2693
